# Supplementary material
Source: PubMed Central journal article supplement (PMC4914435)
Supplement: NIHMS750087-supplement-9.pdf [file NIHMS750087-supplement-9.pdf]

**Supplemental Table 2 - Primer Details**

| <b>Allele/Gene</b> | <b>F primer</b> | <b>F primer sequence</b>                     | <b>R primer</b> | <b>R primer sequence</b>                             | <b>PCR product size</b> | <b>Annealing Tm</b> |
|--------------------|-----------------|----------------------------------------------|-----------------|------------------------------------------------------|-------------------------|---------------------|
| <i>Memo1-enu</i>   | Memo1-8F        | 5'-cta-tat-gtg-gaa-gac-atc-cca-ttg-ggg-tg-3' | Memo1-INT       | 5'-ctg-aca-aag-tca-aga-gaa-gat-atg-cct-ctc-ttc-ca-3' | 274bp*                  | 58°C                |
| <i>Memo1-neo</i>   | Memo1-e4F       | 5'-gga-ctc-ctc-tgt-atg-atc-ttc-g-3'          | Memo1-R1        | 5'-gcc-aag-tct-ttc-atc-agg-ttg-3'                    | wt: 333bp; neo: 395bp   | 58°C                |
| <i>Memo1-ki</i>    | Memo1-nullF1    | 5'-cgg-tcg-cta-cca-tta-cca-gt-3'             | Memo1-R1        | 5'-gcc-aag-tct-ttc-atc-agg-ttg-3'                    | 499bp                   | 58°C                |
| <i>Memo1-flp</i>   | Memo1-flpF1     | 5'-cca-agg-act-gtg-gtt-tta-gtt-ca-3'         | Memo1-flpR1     | 5'-cca-gaa-tgt-tgg-acc-ctt-ga-3'                     | wt: 311bp; flp: 397bp   | 58°C                |
| <i>Memo1-null</i>  | Memo1-flpF1     | 5'-cca-agg-act-gtg-gtt-tta-gtt-ca-3'         | Memo1-R1        | 5'-gcc-aag-tct-ttc-atc-agg-ttg-3'                    | wt: 1183bp; null: 400bp | 58°C                |
| <i>Wnt1CRE</i>     | Wnt1CRE-F       | 5'-ctc-att-gtc-tgt-ggc-cct-gac-c-3'          | Wnt1CRE-R       | 5'-acg-cct-ggc-gat-ccc-tga-ac-3'                     | ~450bp                  | 70°C                |

\*For genotyping, PCR product was subsequently digested with either XmnI (cuts ENU allele), or Scal (cuts WT allele)
